# Supplementary material
Source: PubMed Central journal article supplement (PMC8573532)
Supplement: NIHMS1747213-supplement-1.pdf [file NIHMS1747213-supplement-1.pdf]

## **Supplementary Materials**

### **Polymeric Nanomedicine for overcoming Resistance Mechanisms in Hedgehog and MYC-amplified Medulloblastoma**

Virender Kumar, Qiyue Wang, Bharti Sethi, Vinod Kumar, Feng Lin, Donald W. Coulter,  
Yuxiang Dong and Ram I. Mahato

This PDF file includes:

Figures. S1 to S8

Table S1

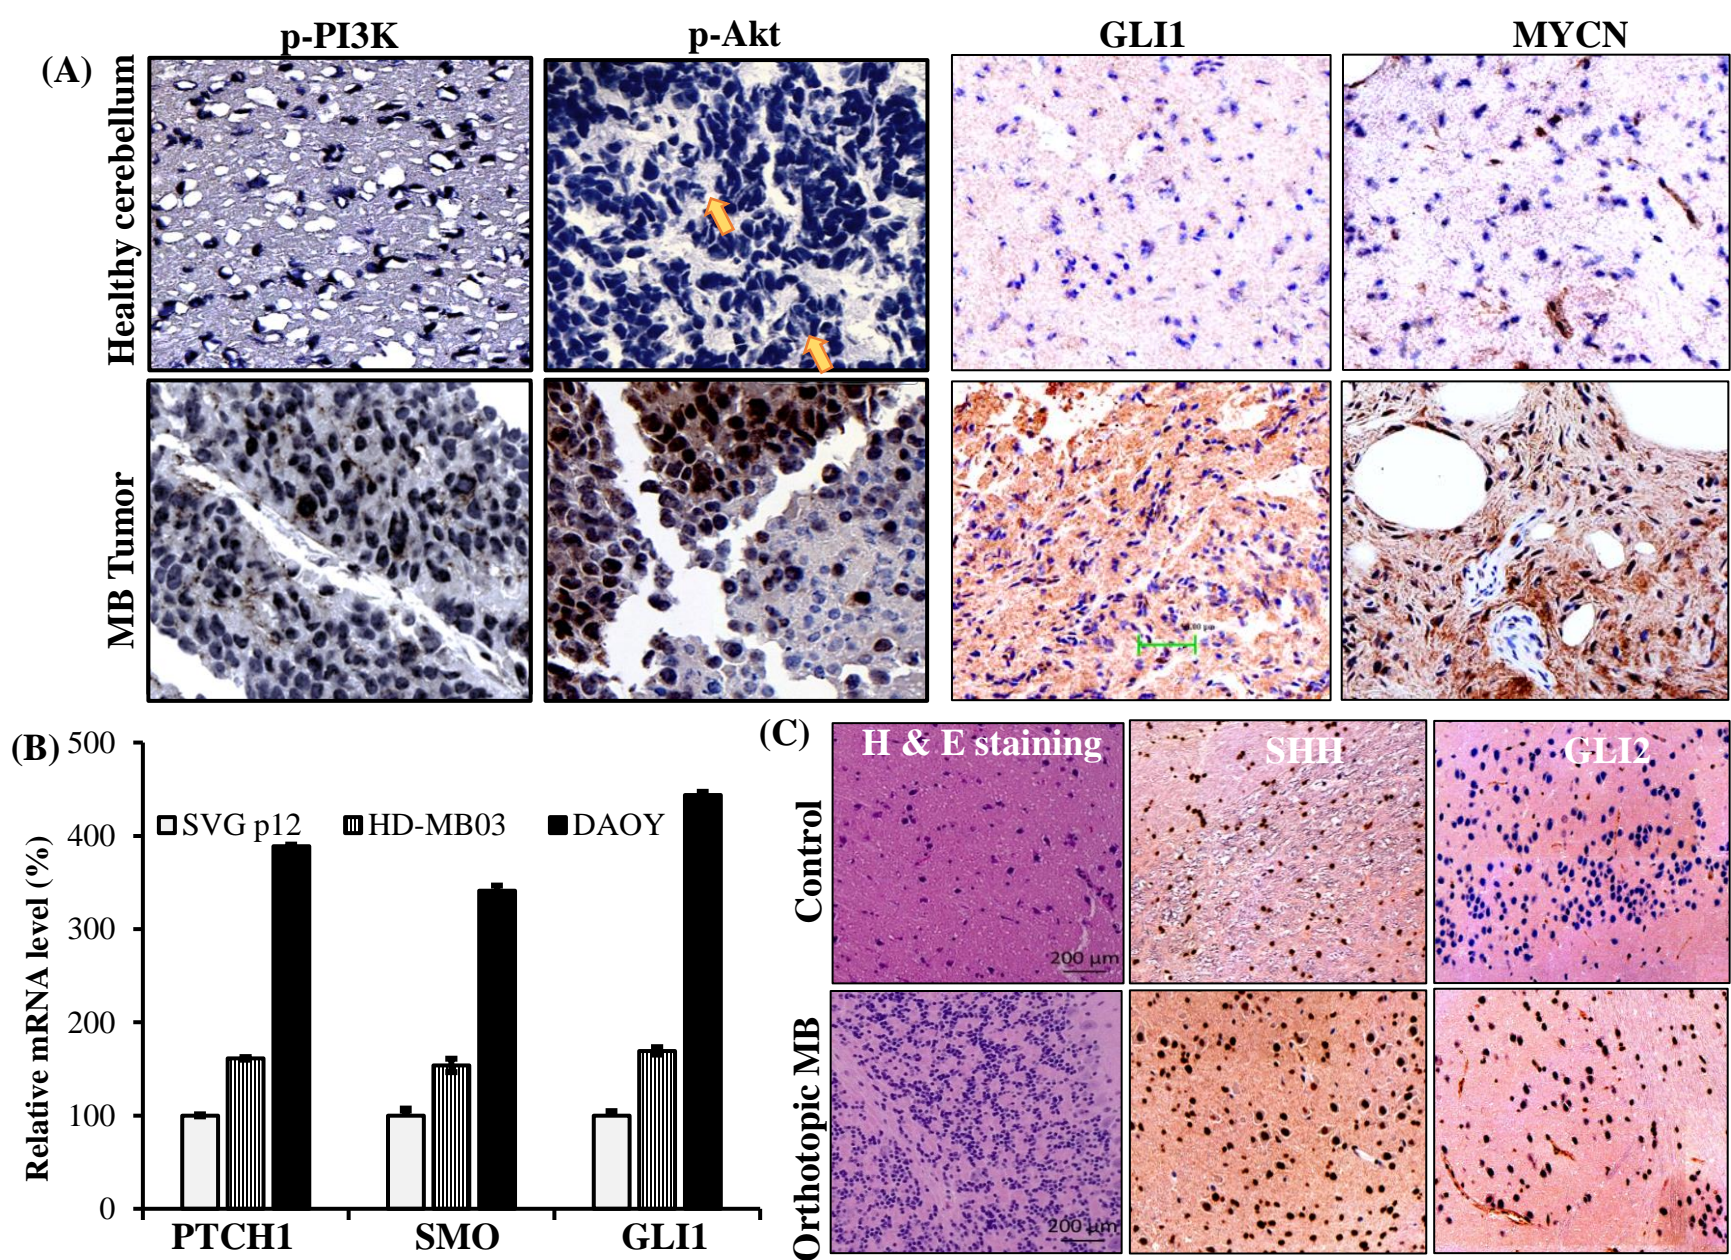

**Figure S1. Human medulloblastoma (MB) upregulates PI3K/AKT, MYCN, and hedgehog (Hh) signaling pathways.** A) Immunohistochemical (IHC) images of tumors and adjacent healthy cerebellum stained for p-PI3K, p-AKT, GLI1 and MYCN expression (magnification 20 X). B) Expression levels of PTCH1, SMO and GLI1 in SVG p12 (healthy cells), HD-MB03 (Group 3) and DAOY (SHH) cells as determined by real-time RT-PCR. C) IHC staining of normal brain tissue and MB tissue isolated from orthotopic MB tumor generated after stereotaxically injection of luciferase-expressing DAOY cells 2 mm deep into the cerebellum of NSG mice..



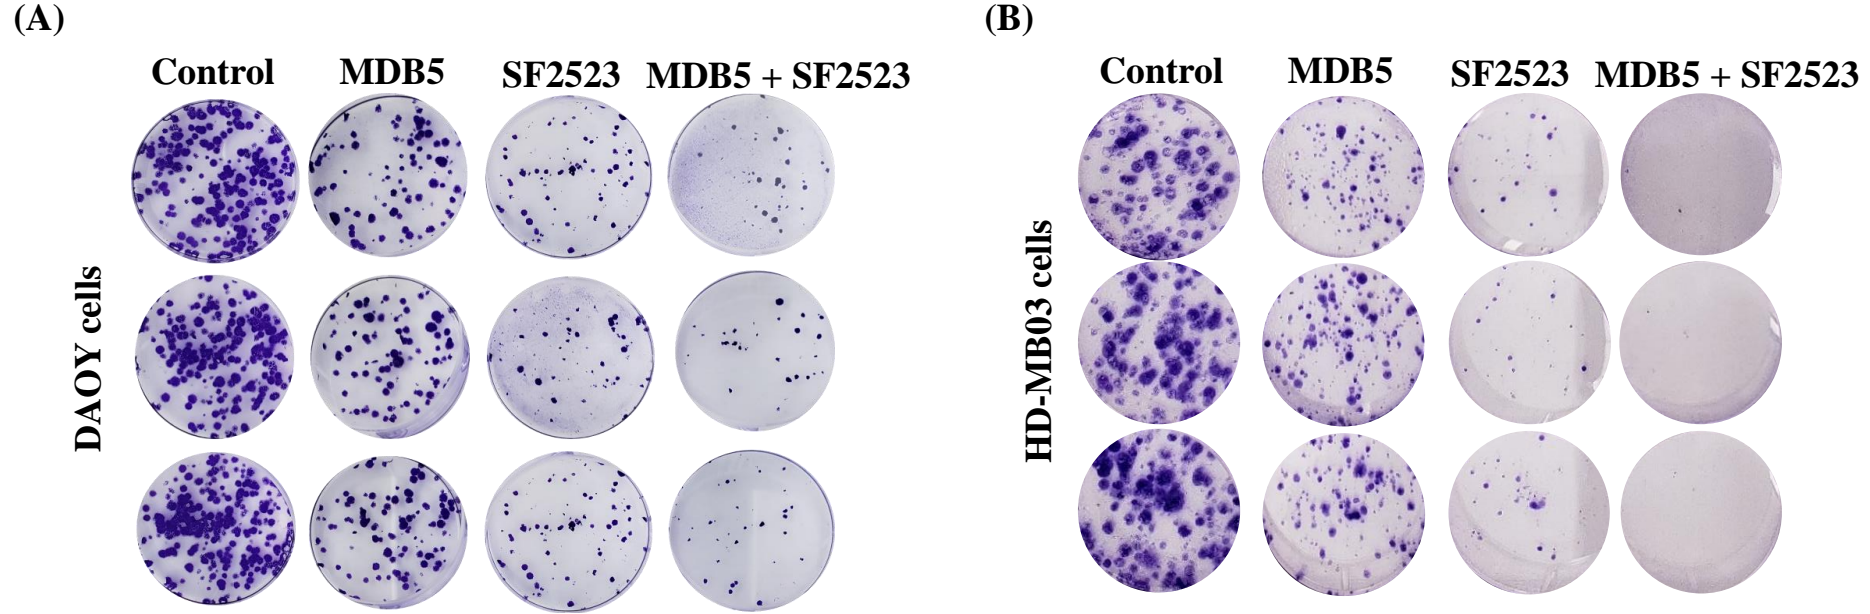

**Figure S2. Colony formation ability of DAOY and HD-MB03 cells after different treatments.** A) Representative colony formation assay of DAOY cells. B) Representative colony formation assay of HD-MB03 cells. The figure is a representative of three experiments with similar results.

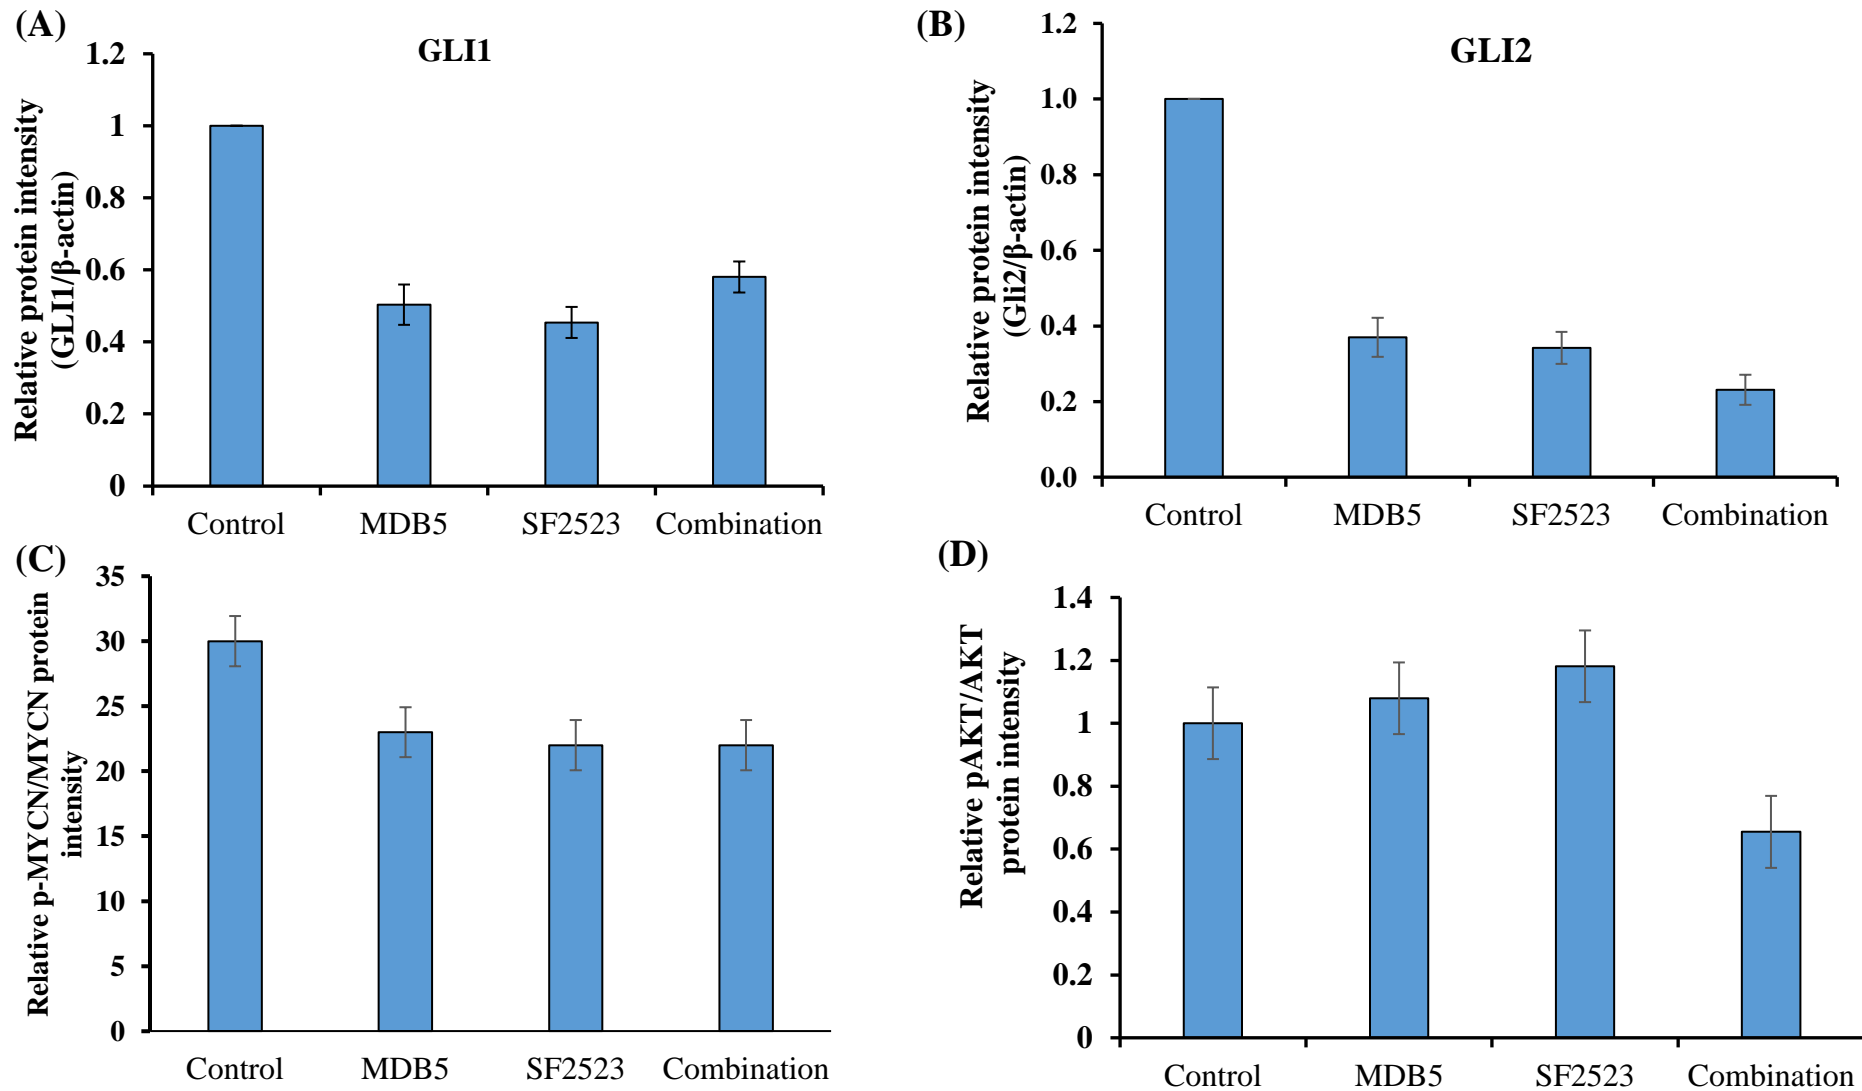

**Figure S3. Western blot analysis.** Intensity quantification of A) GLI1, B) GLI2 normalized to  $\beta$ -actin. C) p-MYCN and D) p-AKT levels normalized to total MYC and total AKT, respectively. Data are presented as mean  $\pm$  SD; Statistics were done by one-way ANOVA. (\*  $p < 0.05$ , vs. Vehicle).

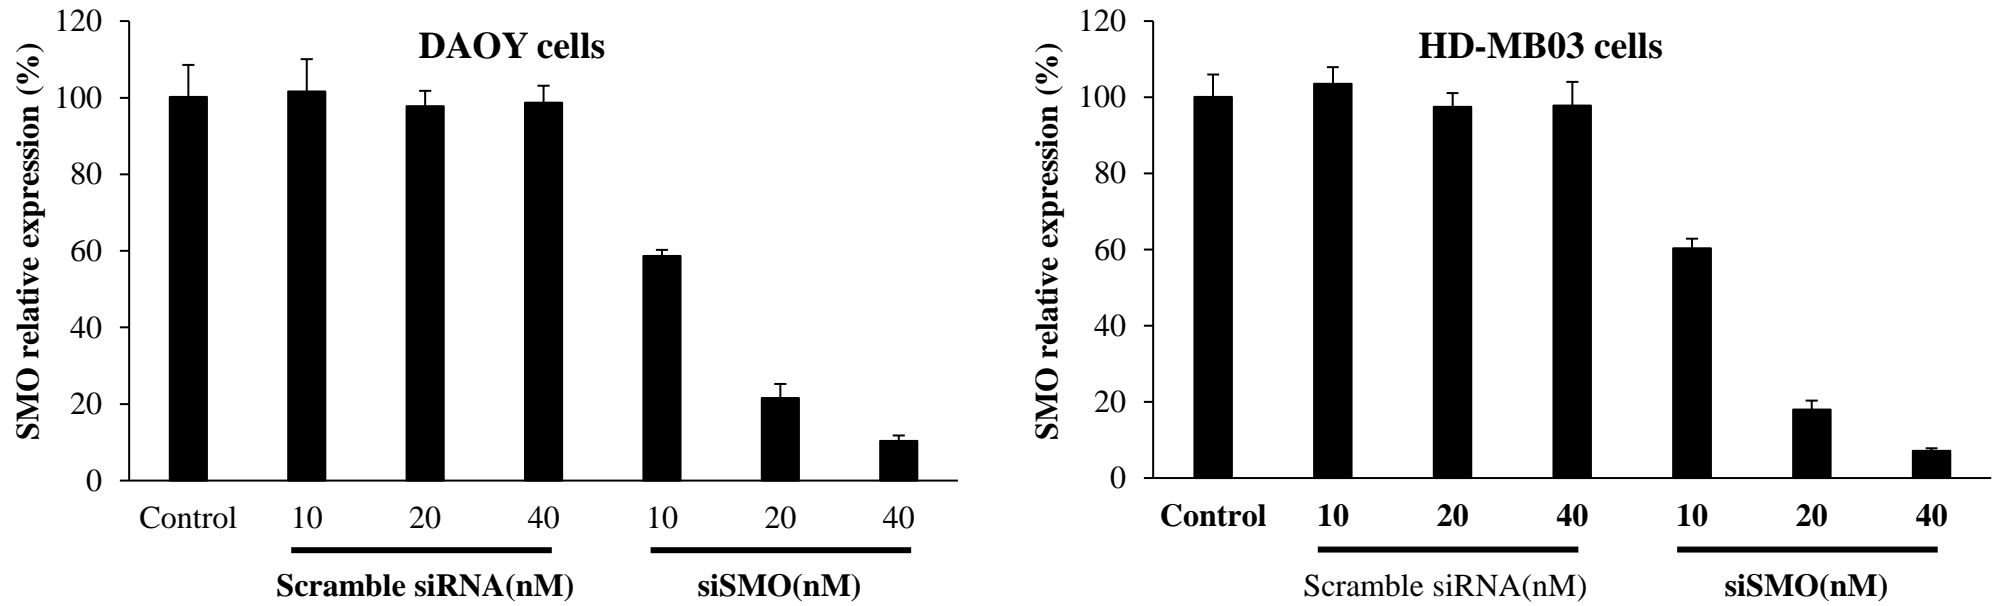

**Figure S4.** siRNA against SMO (siSMO) but not scrambled siRNA inhibits SMO expression after transfection of DAOY and HD-MB03 cells with Lipofectamine/siSMO or Lipofectamine/scrambled siRNA complexes for 24 h.

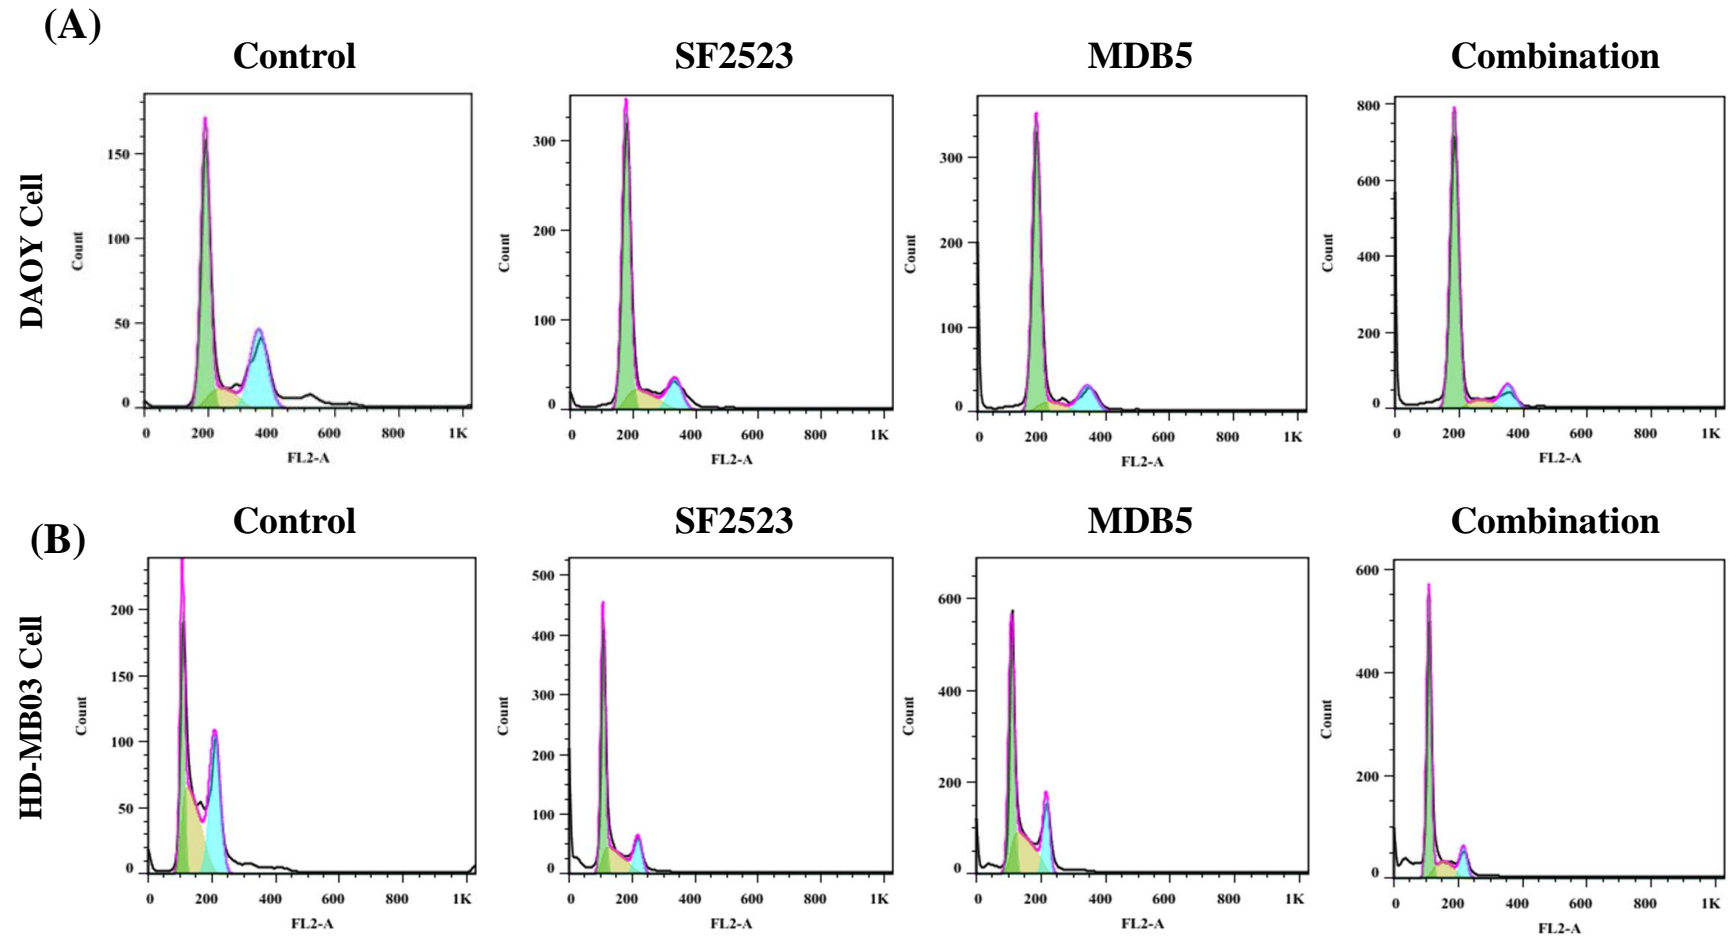

**Figure S5. Representative flow cytometry histograms of SF2523 and MDB5 on cell cycle of MB cells (A) cell cycle after incubation of DAOY and (B) HD-MB03 cells for 48h. The DNA histograms show the distribution of cell populations in each phase of the cell cycle. Flow cytometry data from three independent experiments.**

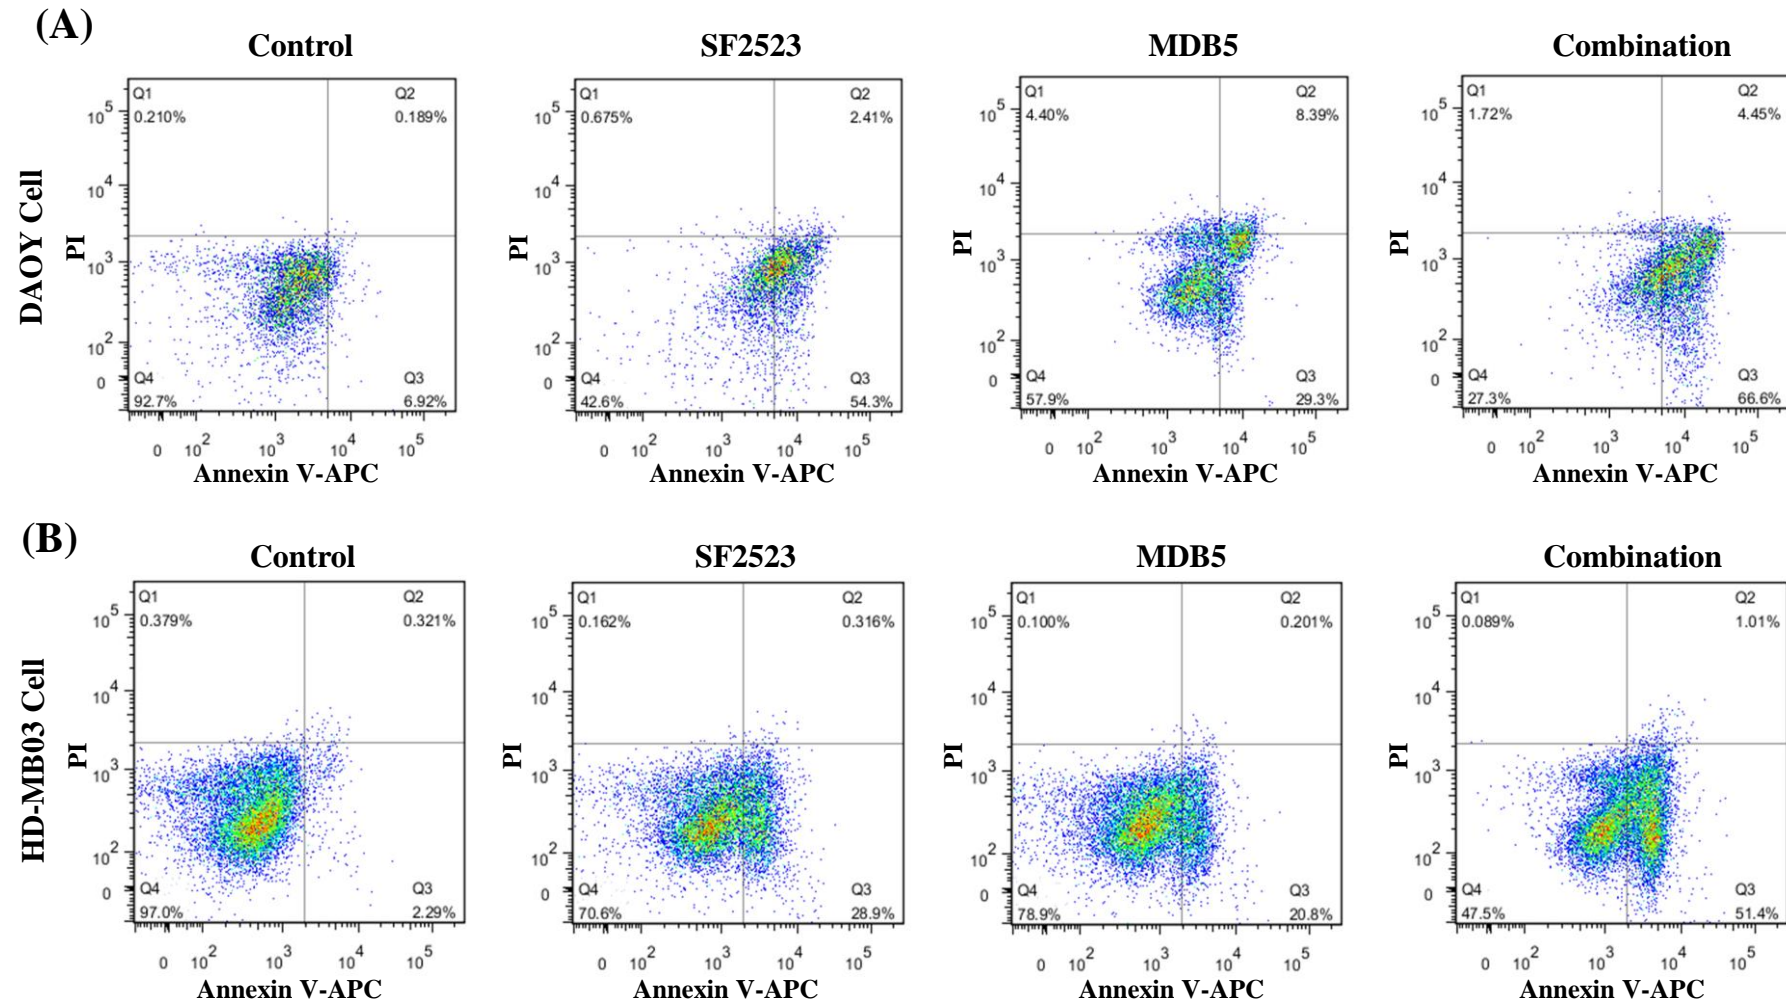

**Figure S6. Effect of MDB5, SF2523 and their combination on apoptosis.** A) Analysis of Annexin V-APC and propidium iodide-stained cells by flow cytometry in DAOY cells. B) HD-MB03 cells. Data represents three different independent experiments.

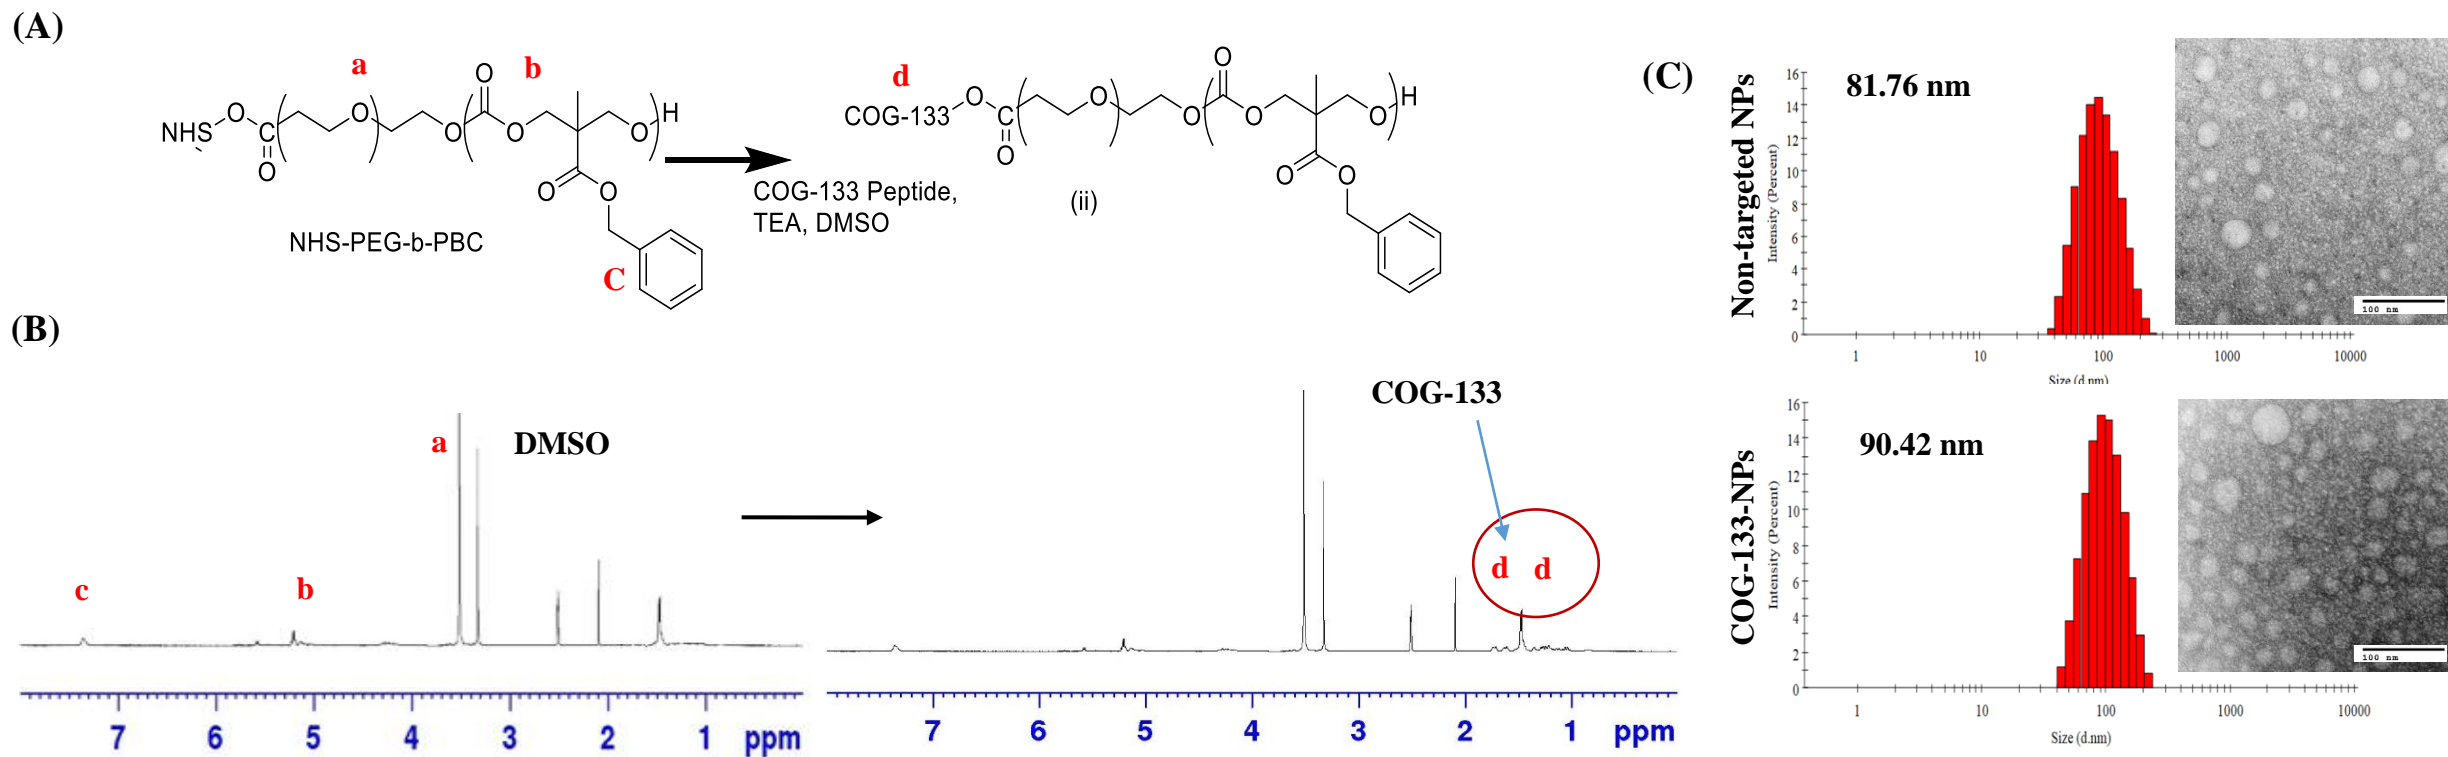

**Figure S7. Synthesis and characterization of brain targeted COG-133-NPs.** A) Synthesis scheme of apolipoprotein E mimetic peptide COG-133 conjugated polymer COG-133-PEG-b-PBC. B)  $^1\text{H}$  NMR spectrum of polymers without and with COG-133 peptide. C) Effect of COG-133 decoration on NP size distribution, morphology determined by DLS and TEM.



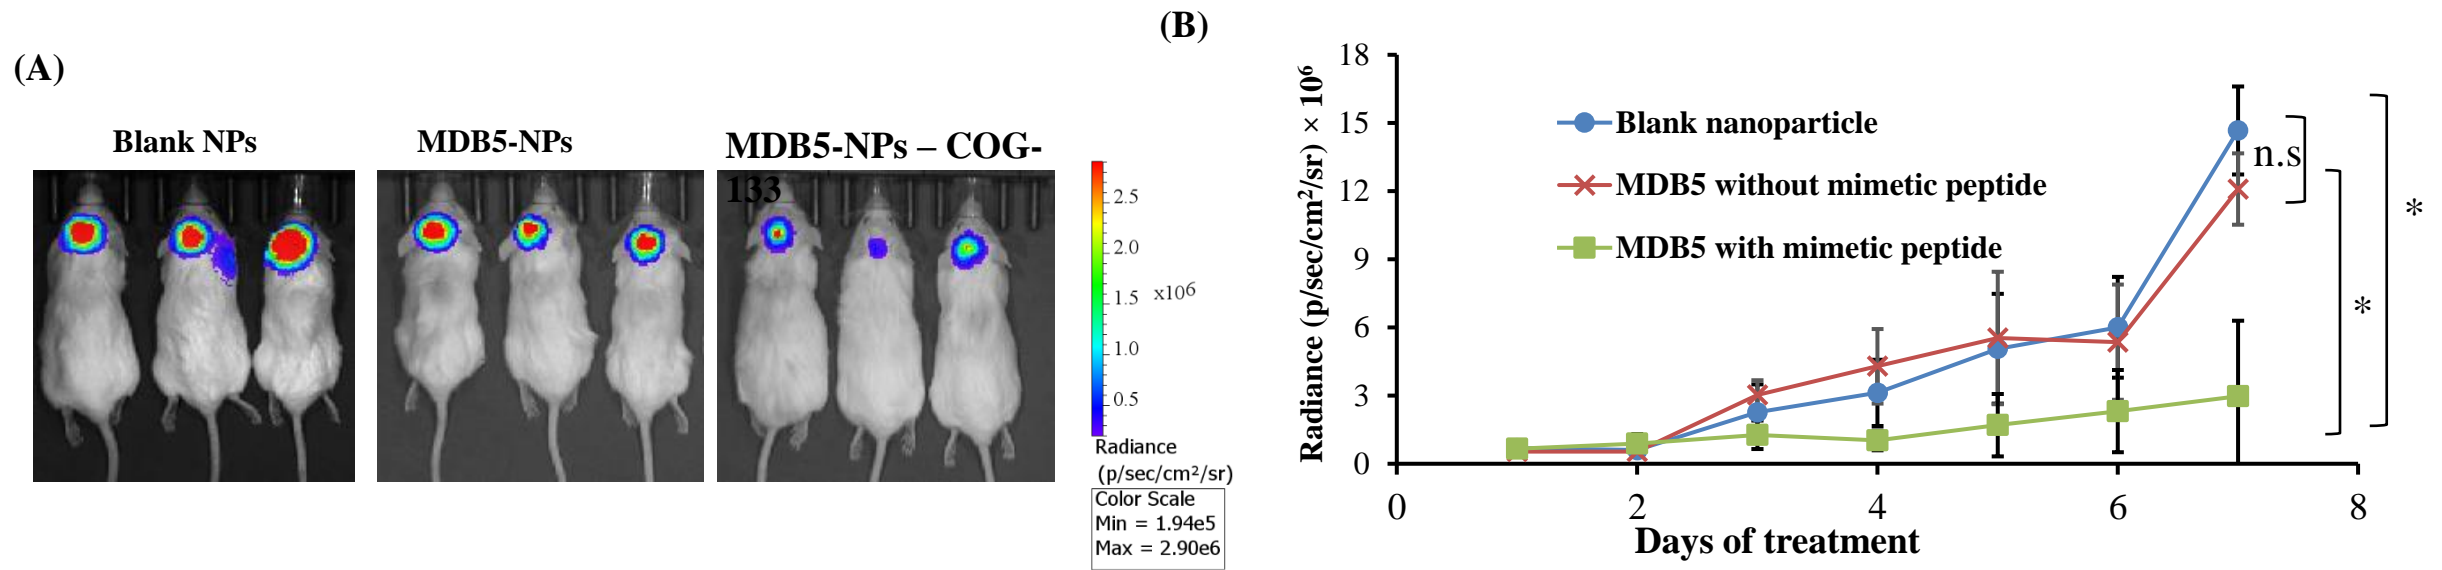

**Figure S8. Antitumor efficacy of COG-133 decorated NP loaded with MDB5.** A) Representative bioluminescence images (BLI) of mice after treatment. B) BLI photon intensity ( $*p < 0.01$  vs. blank NPs;  $n=4$ ; n.s.= non-significant). Drug formulations were injected at the dose of 20mg/kg every alternate days.

| Chemical Structure                                                                                       | Molecular weight | Solubility (PBS, pH 5.0)<br>( $\mu\text{g/mL}$ ) | Solubility (PBS, pH 7.4)<br>( $\mu\text{g/mL}$ ) |
|----------------------------------------------------------------------------------------------------------|------------------|--------------------------------------------------|--------------------------------------------------|
| 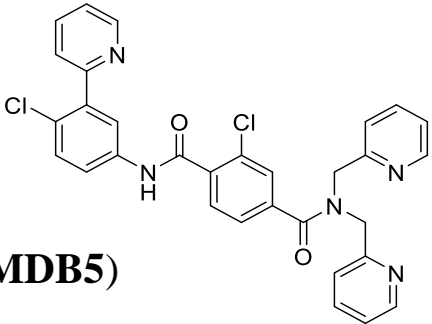 <p><b>(MDB5)</b></p>   | 568.46           | 15.15 $\pm$ 0.37                                 | 14.72 $\pm$ 2.47                                 |
|  <p><b>(SF2523)</b></p> | 371.41           | 4.10 $\pm$ 0.06                                  | 3.71 $\pm$ 0.611                                 |
| <p>Ac-LRVRLASHLRKLRKRL-amide</p> <p><b>(COG-133)</b></p>                                                 | 2169.73          | -                                                | 47.5 mg/ml (water)                               |

**Supplementary Table S1.** Structures and physicochemical properties of MDB5 and SF2523.

**Table S2A. Combination index data for non constant combination of (SF2523 and MDB5) in DAOY cells.**

| S.N. | SF2523 ( $\mu$ M) | MDB5 ( $\mu$ M) | Inhibitory Effect | Combination index (CI) |
|------|-------------------|-----------------|-------------------|------------------------|
| 1.   | 3.0               | 15              | 0.269             | 1.94                   |
| 2.   | 30                | 30              | 0.364             | 1.68                   |
| 3.   | 3.0               | 45              | 0.408             | 1.76                   |
| 4.   | 3.0               | 60              | 0.566             | 0.87                   |
| 5.   | 6.0               | 15              | 0.384             | 1.34                   |
| 6.   | 6.0               | 30              | 0.522             | 0.89                   |
| 7.   | 6.0               | 45              | 0.534             | 1.05                   |
| 8.   | 6.0               | 60              | 0.591             | 0.91                   |
| 9.   | 9.0               | 15              | 0.455             | 1.22                   |
| 10.  | 9.0               | 30              | 0.536             | 1.03                   |
| 11.  | 9.0               | 45              | 0.551             | 1.14                   |
| 12.  | 9.0               | 60              | 0.605             | 0.99                   |
| 13.  | 12.0              | 15              | 0.546             | 0.97                   |
| 14.  | 12.0              | 30              | 0.568             | 1.04                   |
| 15.  | 12.0              | 45              | 0.640             | 0.83                   |
| 16.  | 12.0              | 60              | 0.669             | 0.79                   |

**Table S2B. Combination index data for non constant combination of (SF2523 and MDB5) in HD-MB03 cells.**

| S.N. | SF2523 ( $\mu$ M) | MDB5 ( $\mu$ M) | Inhibitory Effect | Combination index (CI) |
|------|-------------------|-----------------|-------------------|------------------------|
| 1.   | 1.5               | 25              | 0.364             | 1.60                   |
| 2.   | 1.5               | 50              | 0.454             | 0.95                   |
| 3.   | 1.5               | 75              | 0.516             | 0.68                   |
| 4.   | 1.5               | 100             | 0.561             | 0.54                   |
| 5.   | 3.0               | 25              | 0.498             | 0.66                   |
| 6.   | 3.0               | 50              | 0.564             | 0.45                   |
| 7.   | 3.0               | 75              | 0.577             | 0.49                   |
| 8.   | 3.0               | 100             | 0.589             | 0.51                   |
| 9.   | 4.5               | 25              | 0.558             | 0.51                   |
| 10.  | 4.5               | 50              | 0.606             | 0.39                   |
| 11.  | 4.5               | 75              | 0.615             | 0.41                   |
| 12.  | 4.5               | 100             | 0.627             | 0.42                   |
| 13.  | 6.0               | 25              | 0.580             | 0.53                   |
| 14.  | 6.0               | 50              | 0.635             | 0.35                   |
| 15.  | 6.0               | 75              | 0.642             | 0.37                   |
| 16.  | 6.0               | 100             | 0.646             | 0.40                   |
